# Supplementary material for: Comparison of Potentially Inappropriate Medications for People with Dementia at Admission and Discharge during An Unplanned Admission to Hospital: Results from the SMS Dementia Study
Source: MDPI journal article supplement (doi:10.3390/healthcare7010008), 2019-01-09
Supplement: s1 [file s1]

**Figure S1: MODIFIED ANTICHOLINERGIC BURDEN SCORE (mACB) (AUS)**

| <b>DRUG<br/>(ALPHABETICAL ORDER)</b> | <b>ANTICHOLINERGIC<br/>SCORE</b> | <b>BURDEN</b> |
|--------------------------------------|----------------------------------|---------------|
| Alprazolam                           | 1                                |               |
| Amantadine                           | 2                                |               |
| Amitriptyline                        | 3                                |               |
| Aripiprazole                         | 1                                |               |
| Asenapine                            | 1                                |               |
| Atenolol                             | 1                                |               |
| Atropine                             | 3                                |               |
| Baclofen                             | 2                                |               |
| Belladonna                           | 2                                |               |
| Benzatropine                         | 3                                |               |
| Brompheniramine                      | 3                                |               |
| Bupropion                            | 1                                |               |
| Captopril                            | 1                                |               |
| Carbamazepine                        | 2                                |               |
| Cetirizine                           | 2                                |               |
| Chlorpheniramine                     | 3                                |               |
| Chlorpromazine                       | 3                                |               |
| Chlorthalidone                       | 1                                |               |
| Cimetidine                           | 2                                |               |
| Clomipramine                         | 3                                |               |
| Clozapine                            | 3                                |               |
| Codeine                              | 1                                |               |
| Colchicine                           | 1                                |               |

|                        |   |
|------------------------|---|
| Cyproheptadine         | 1 |
| Darifenacin            | 3 |
| Desipramine            | 2 |
| Desloratadine          | 1 |
| Diazepam               | 1 |
| Digoxin                | 1 |
| Diphenhydramine        | 3 |
| Dipyridamole           | 1 |
| Disopyramide           | 1 |
| Doxepin                | 3 |
| Doxylamine             | 3 |
| Fentanyl               | 1 |
| Fluphenazine           | 1 |
| Fluvoxamine            | 1 |
| Furosemide (frusemide) | 1 |
| Haloperidol            | 1 |
| Hydralazine            | 1 |
| Hydrocortisone         | 1 |
| Hyoscyamine            | 3 |
| Imipramine             | 3 |
| Isosorbide             | 1 |
| Levocetirizine         | 1 |
| Loperamide             | 1 |
| Loratadine             | 2 |
| Metoprolol             | 1 |
| Metoclopramide         | 1 |
| Mirtazapine            | 1 |
| Morphine               | 1 |

|                             |   |
|-----------------------------|---|
| Nifedipine                  | 1 |
| Nortriptyline               | 3 |
| Olanzapine                  | 3 |
| Orphenadrine                | 3 |
| Oxybutynin                  | 3 |
| Oxcarbazepine               | 2 |
| Paliperidone                | 1 |
| Paroxetine                  | 3 |
| Periciazine                 | 2 |
| Prednisone/prednisolone     | 1 |
| Prochlorperazine            | 2 |
| Promethazine                | 3 |
| Propantheline               | 3 |
| Pseudoephedrine             | 2 |
| Quetiapine                  | 3 |
| Quinidine                   | 1 |
| Ranitidine                  | 1 |
| Reboxetine                  | 1 |
| Risperidone                 | 1 |
| Sertraline                  | 2 |
| Solifenacin                 | 3 |
| Theophylline                | 3 |
| Thioridazine                | 3 |
| Tiotropium                  | 2 |
| Tolterodine                 | 3 |
| Triamterene                 | 1 |
| Trifluoperazine             | 3 |
| Trihexyphenidyl (benzhexol) | 3 |

|              |   |
|--------------|---|
| Trimipramine | 3 |
| Venlafaxine  | 1 |
| Warfarin     | 1 |

## References:

Polypharmacy Guidance Scottish NHS Trust United Kingdom using the Anticholinergic Risk Scale (ARS) ranking medication with anticholinergic potential on a scale of: 1. Moderate, 2. Strong, 3. Very strong.

Anticholinergic Cognitive Burden Scale 2012 Developed by the Aging Brain Program of the Indiana Center for Aging Research ACB score of:

1. Evidence from in vitro data that chemical entity has antagonist activity at receptor,
2. Evidence from literature, prescribers information and clinical effect,
3. Evidence from literature, expert opinion and prescribers information that medication may cause delirium

**NOTE:** The following approach was used to modify this ACB Score:

- When a drug had different scores in the two references used, the higher score was assigned.
- When a drug was only listed in one reference then the score for that reference was used.
- The modifications in this scale include only medications approved and in current use in Australia.
